# Supplementary material
Source: MDPI journal article supplement (https://www.mdpi.com/2076-3263/11/3/142)

CONSUMERS ENERGY

WELL: P-201  
FIELD: WILDCAT  
LOCATION: SAINT CLAIRE COUNTY, MI, USA  
ZERO & OFFSET VSP

ENCLOSURE 5: CORRELATION PLOT

ACQUISITION BY BAKER HUGHES GE JUNE 2019  
PROCESSED BY BAKER HUGHES GE JUNE 2019

ACQUISITION INFORMATION

KB ELEVATION 656 FT AMSL  
MINIMUM DEPTH 125 FT (MD KB)  
MAXIMUM DEPTH 2375 FT (MD KB)  
CASING 7 IN 0 - 2490 FT  
ENERGY SOURCE VIBRATOR  
SOURCE ELEVATION 643 FT AMSL  
ZVSP SOURCE EASTING FROM WELLHEAD -175 FT  
ZVSP SOURCE NORTHING FROM WELLHEAD -40 FT  
RECORD LENGTH 8 SECONDS  
SAMPLE INTERVAL 1 MS

VEL. SURVEY PROCESSING SEQUENCE

1. FORMAT CONVERSION
2. EDIT AND STACK DEPTH LEVELS
3. PICK FIRST ARRIVAL TIMES
4. APPLY SOURCE-RECEIVER GEOMETRY
5. VELOCITY SURVEY ANALYSIS

COMMENTS / DISPLAY CONVENTION

SEISMIC REFERENCE DATUM (SRD) = GL  
REPLACEMENT VELOCITY = 6000 FT/SEC  
MEASURED DEPTHS REFERENCED TO KB  
TWO WAY TIME REFERENCED TO SRD = GL  
VERTICAL DEPTH SCALE: 30 CM/SEC

NORMAL POLARITY

AN INCREASE IN ACOUSTIC IMPEDANCE  
IS DISPLAYED AS A PEAK

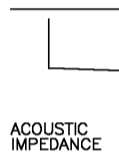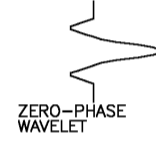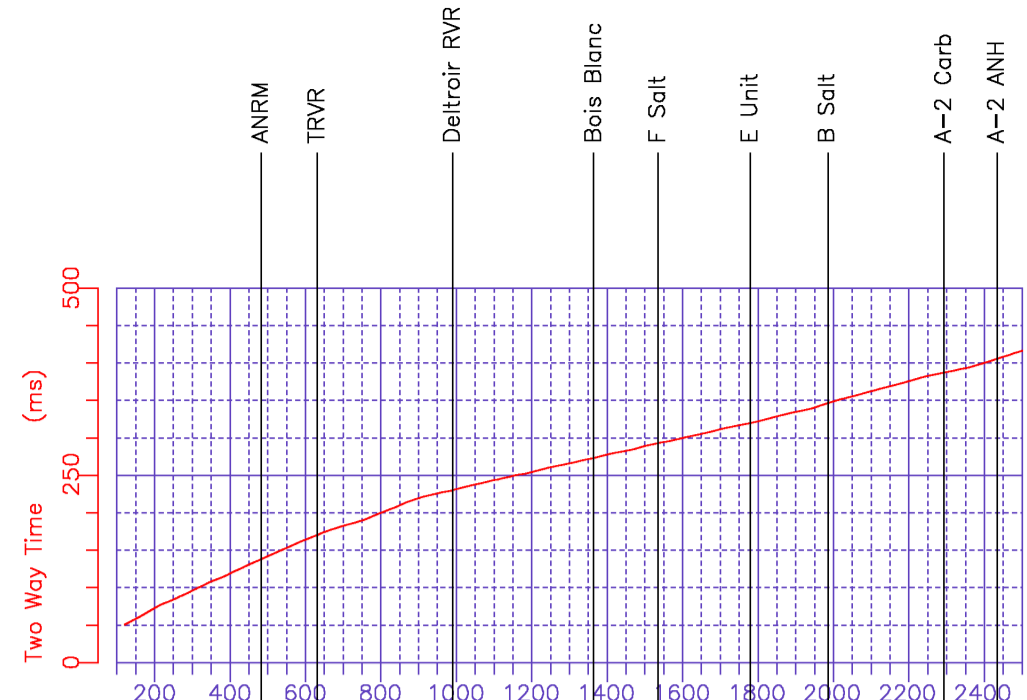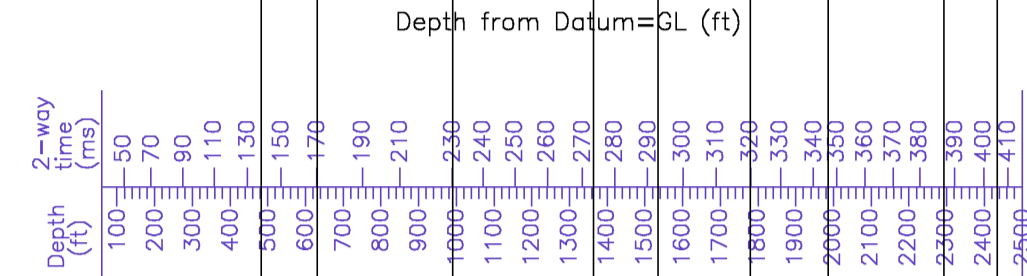

ZVSP Upwaves at Two Way Time

CStk

135 Hz

CStk

110 Hz

CStk

70 Hz

CStk

40 Hz

CDP Tranform from OVSP

+10 ms time shift applied

Inline 91

-15 ms time shift applied

Crossline 66

-15 ms time shift applied

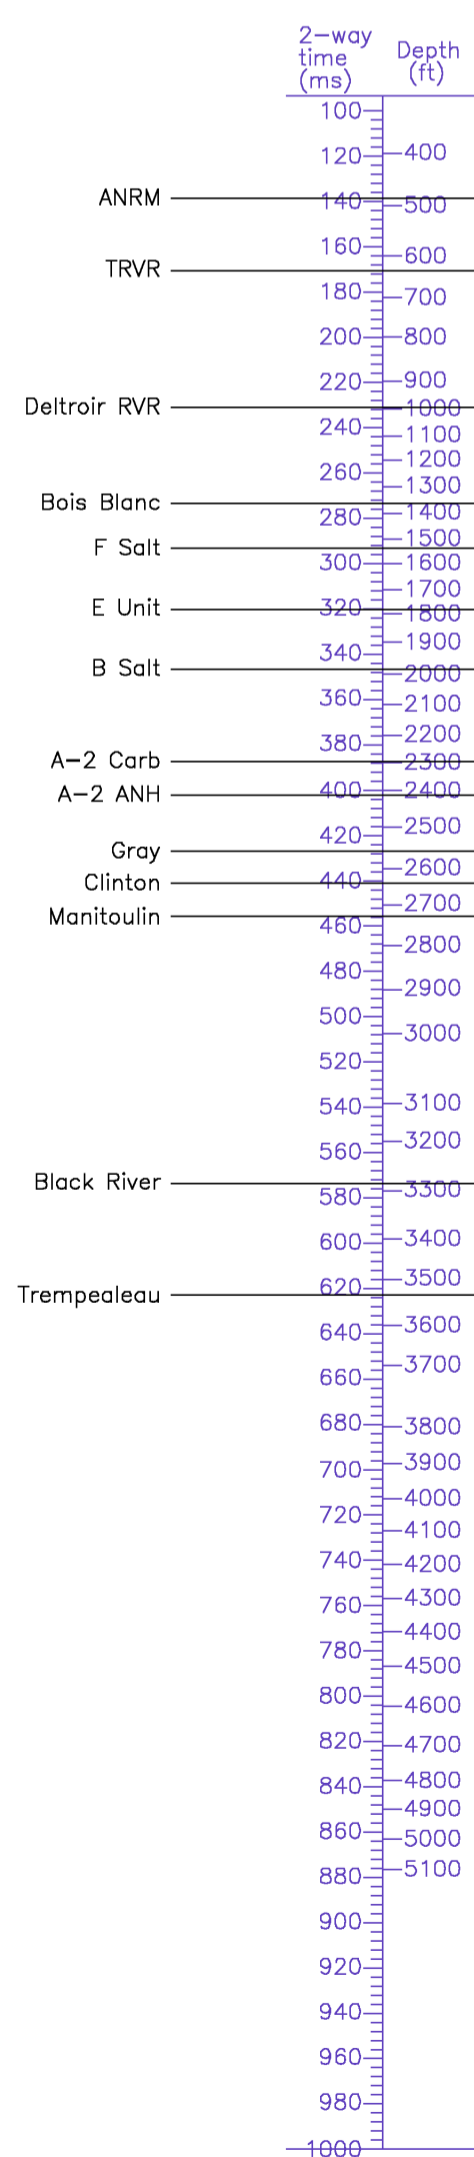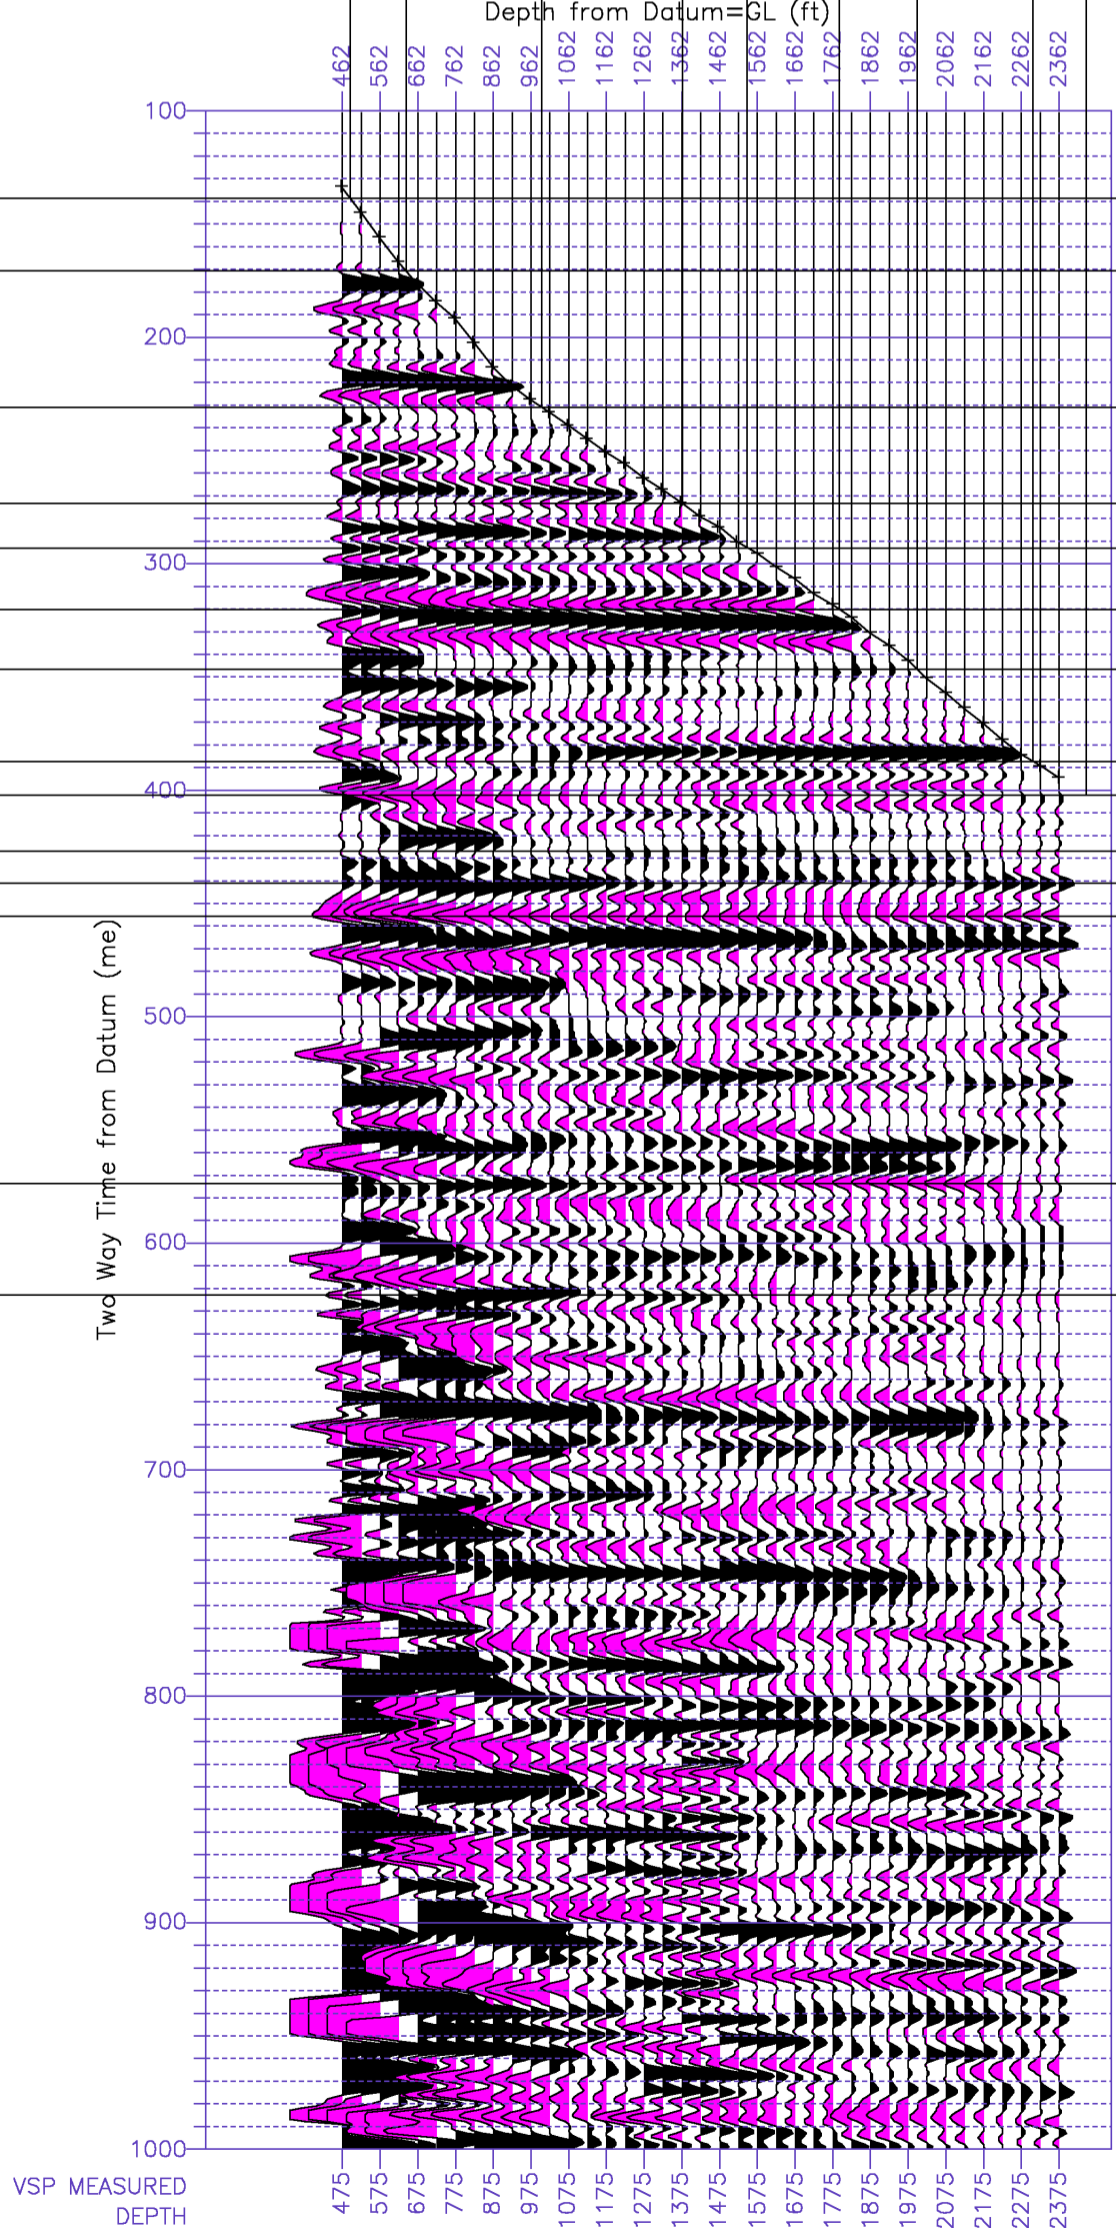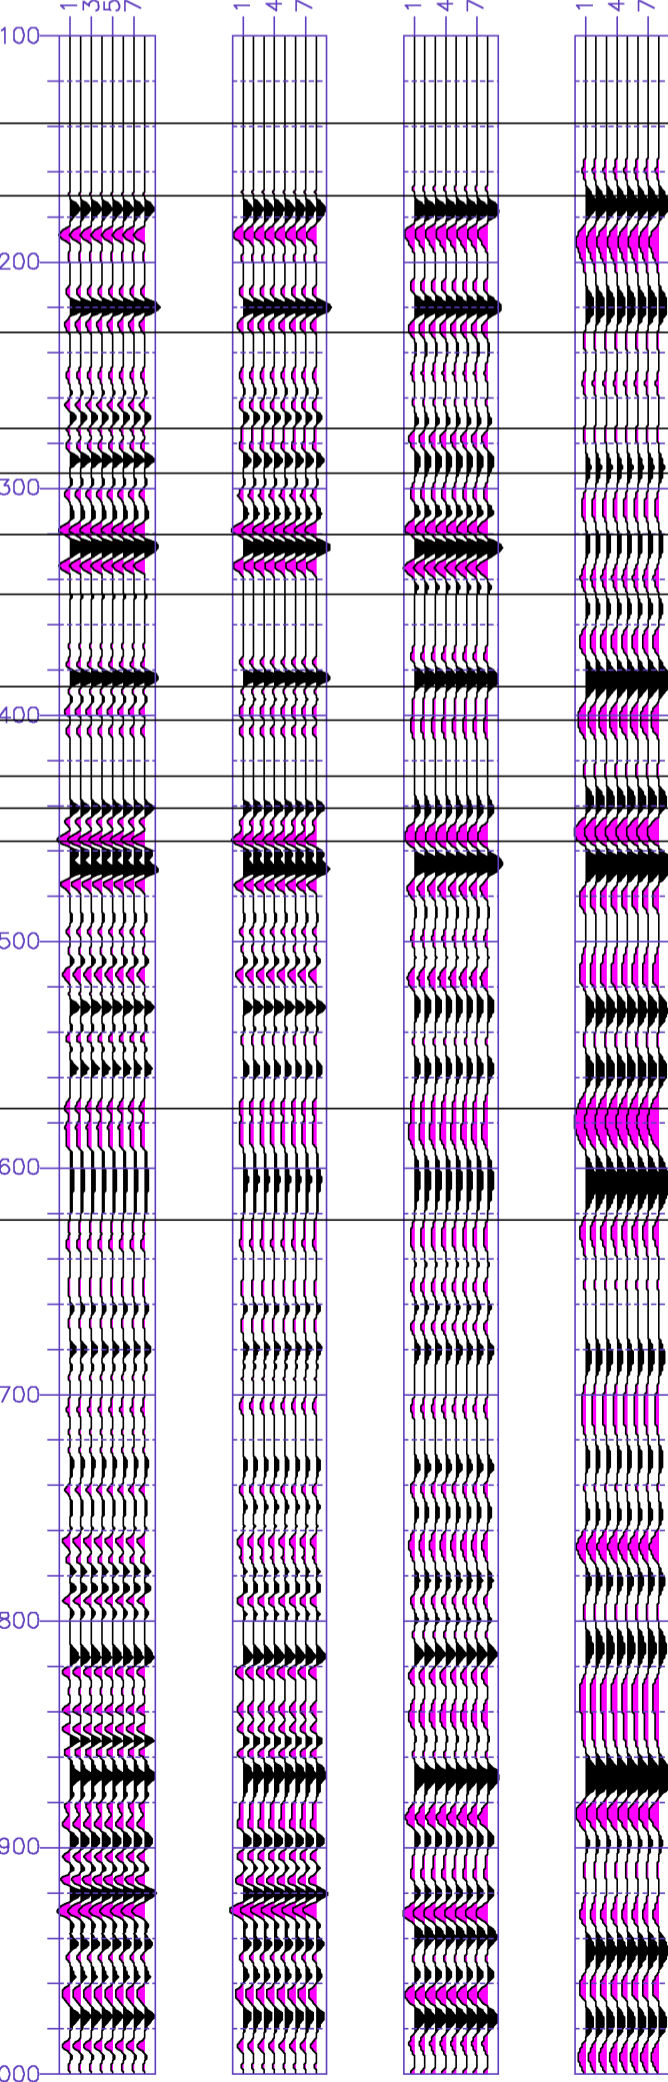

Northing (ft)

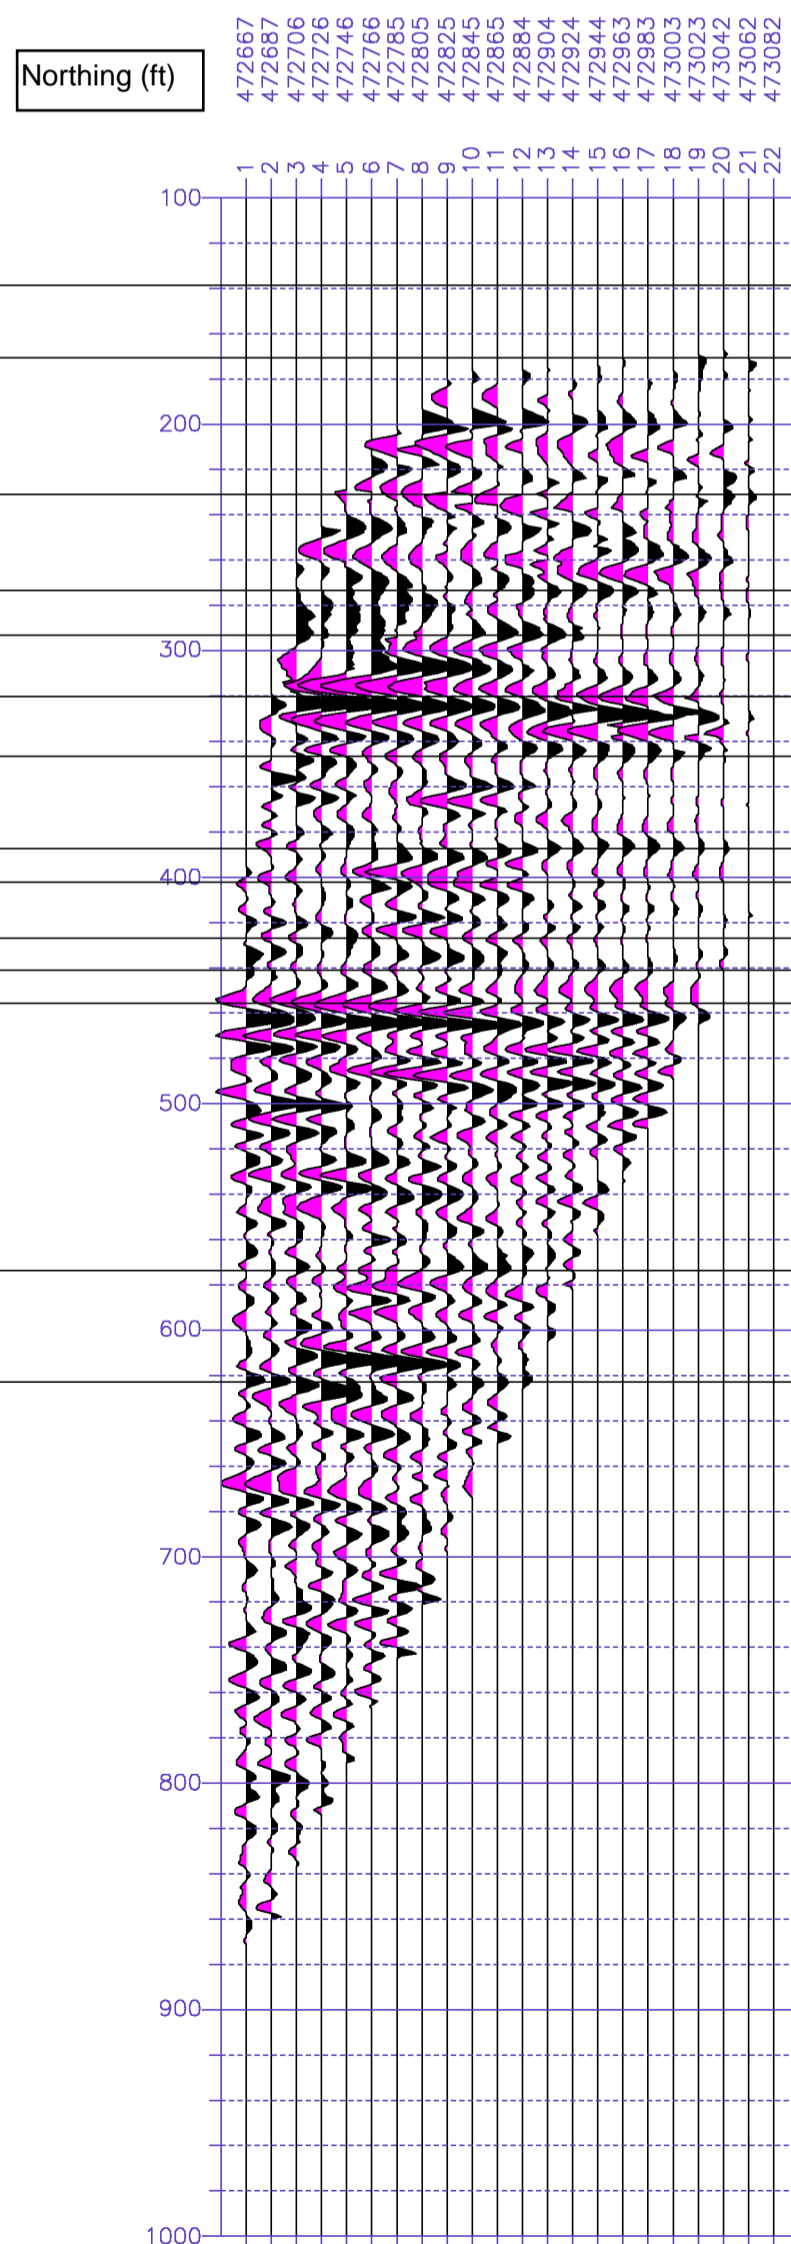

Dist. from well head (ft)

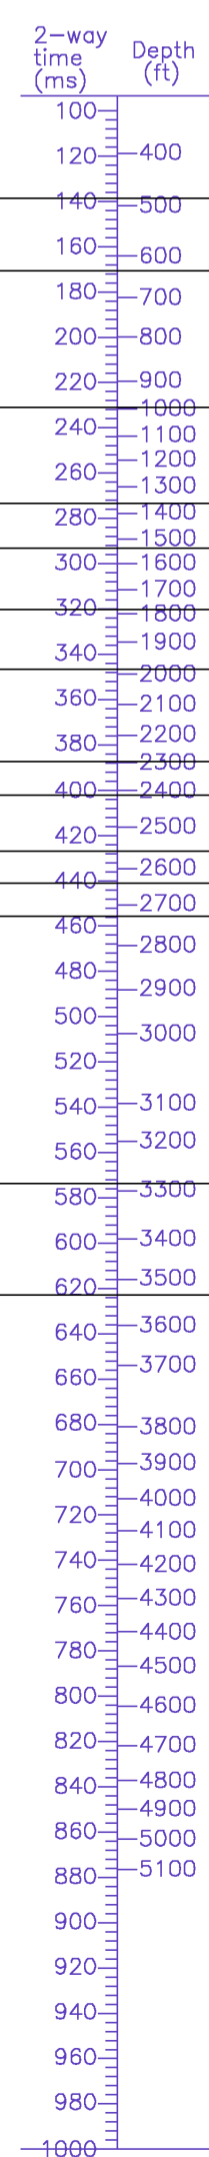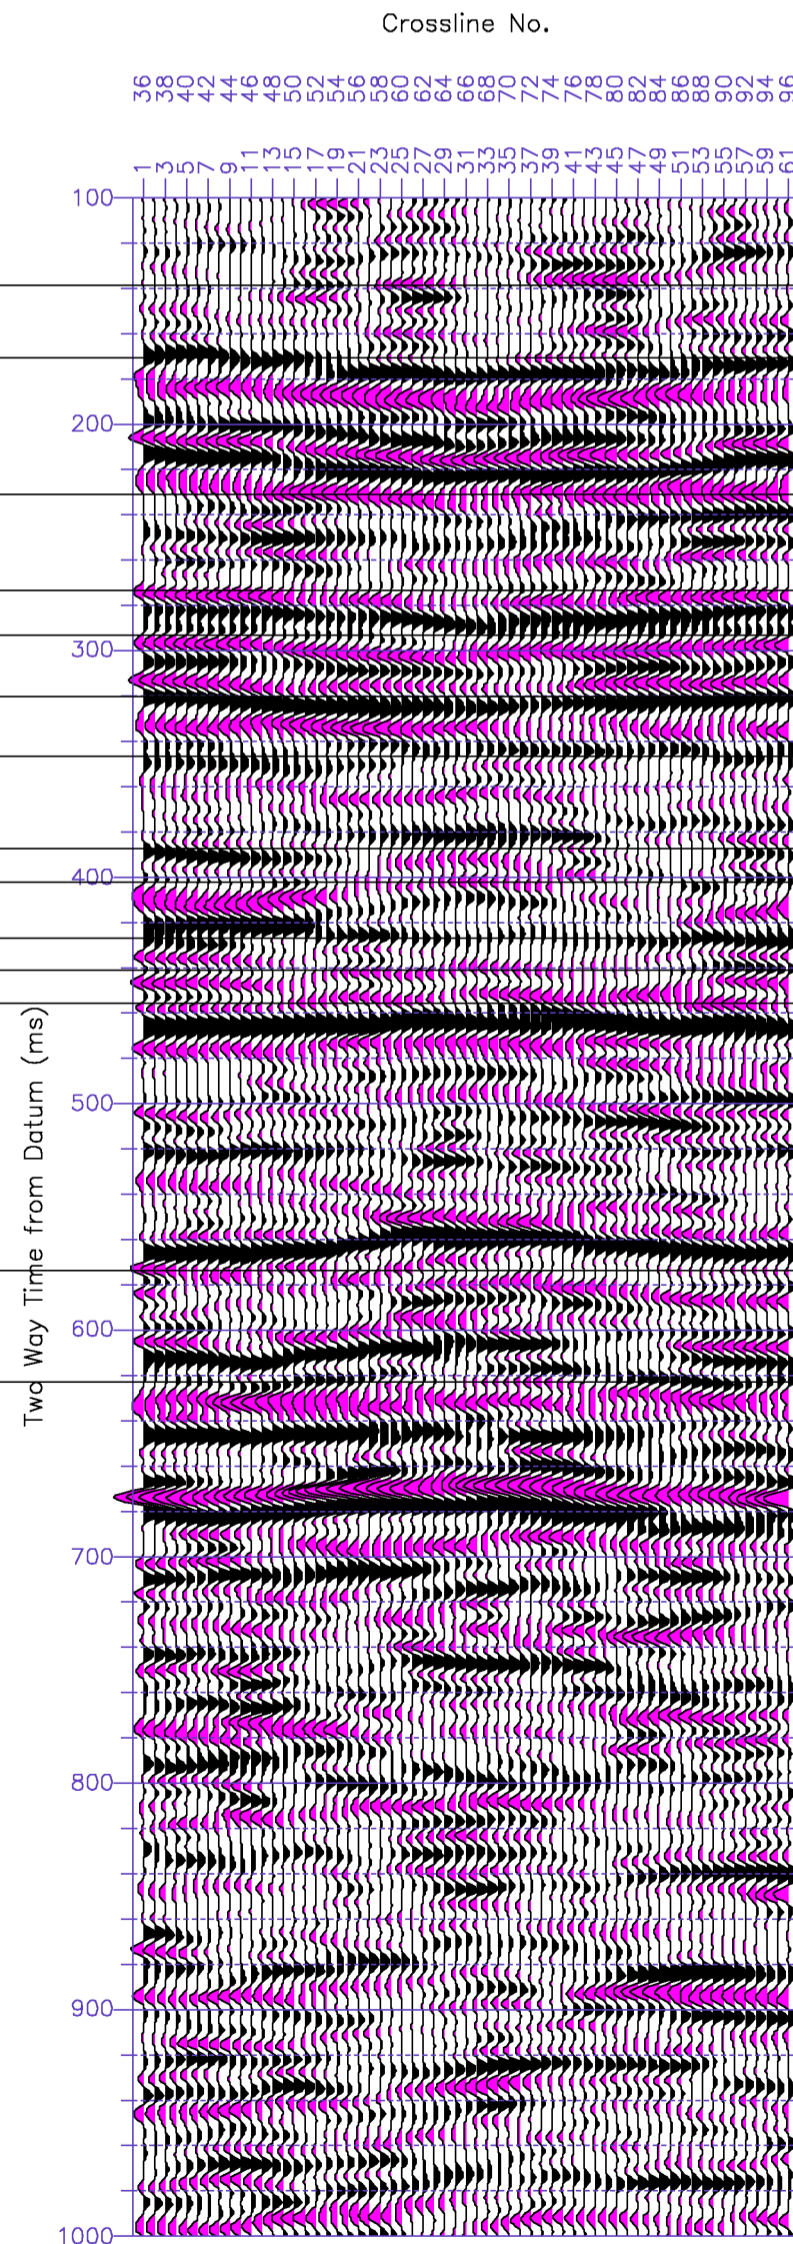

Crossline No.

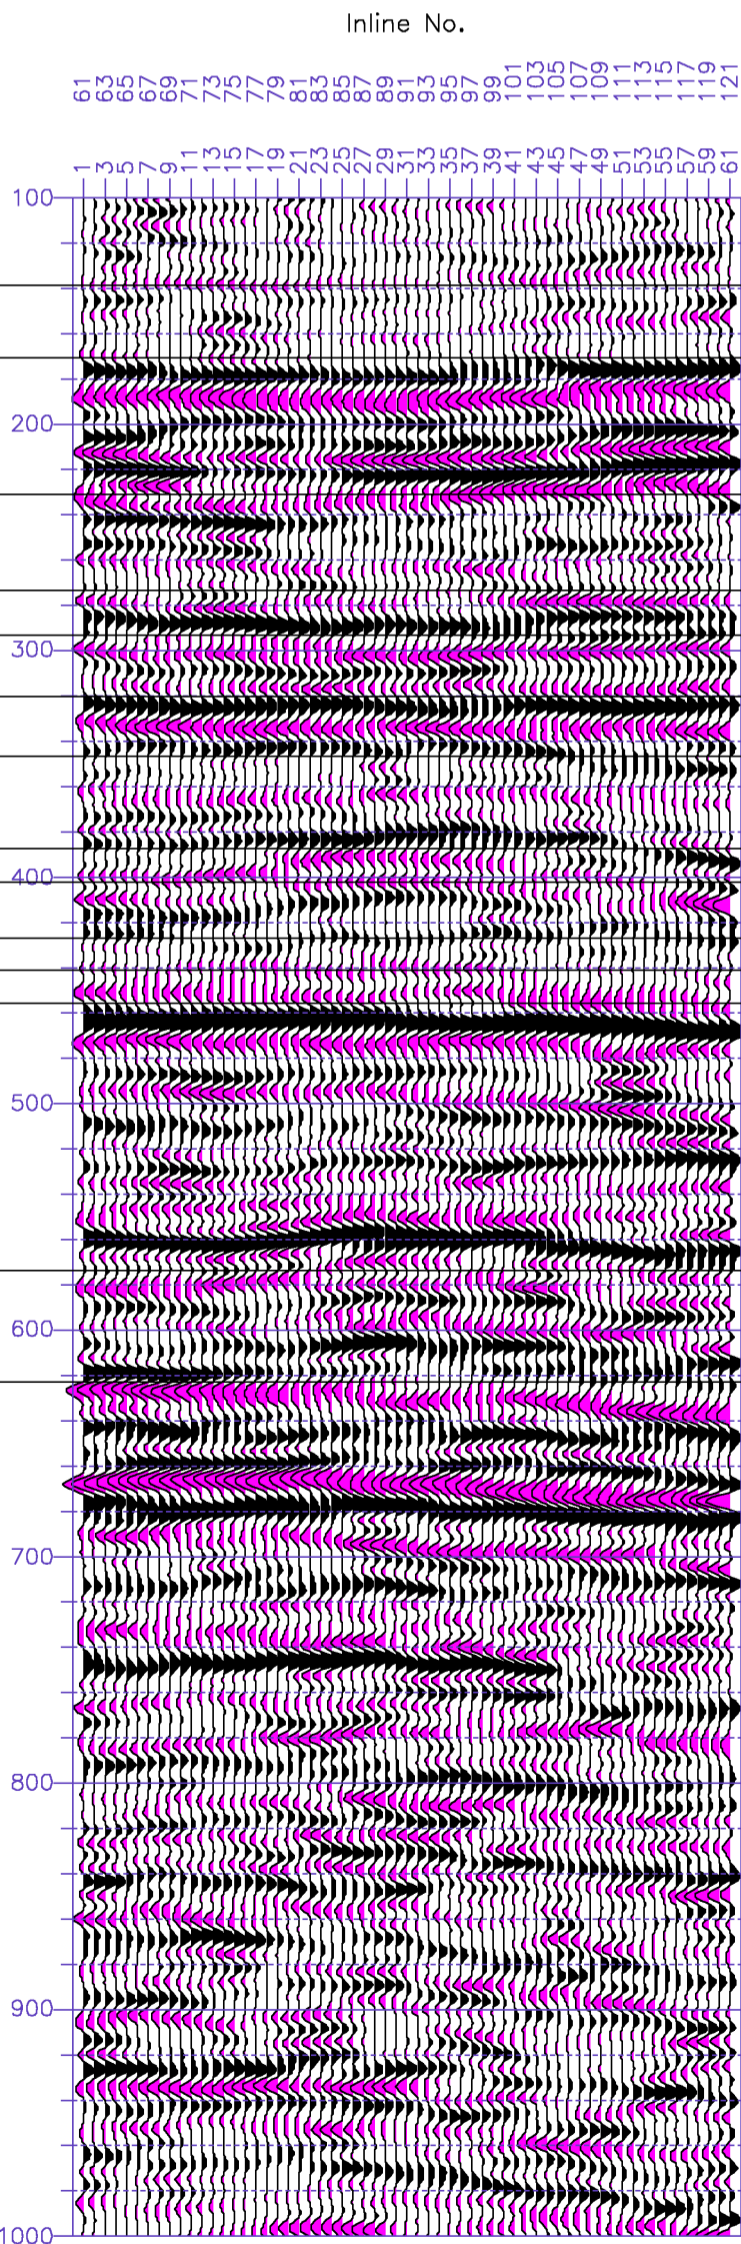

Inline No.

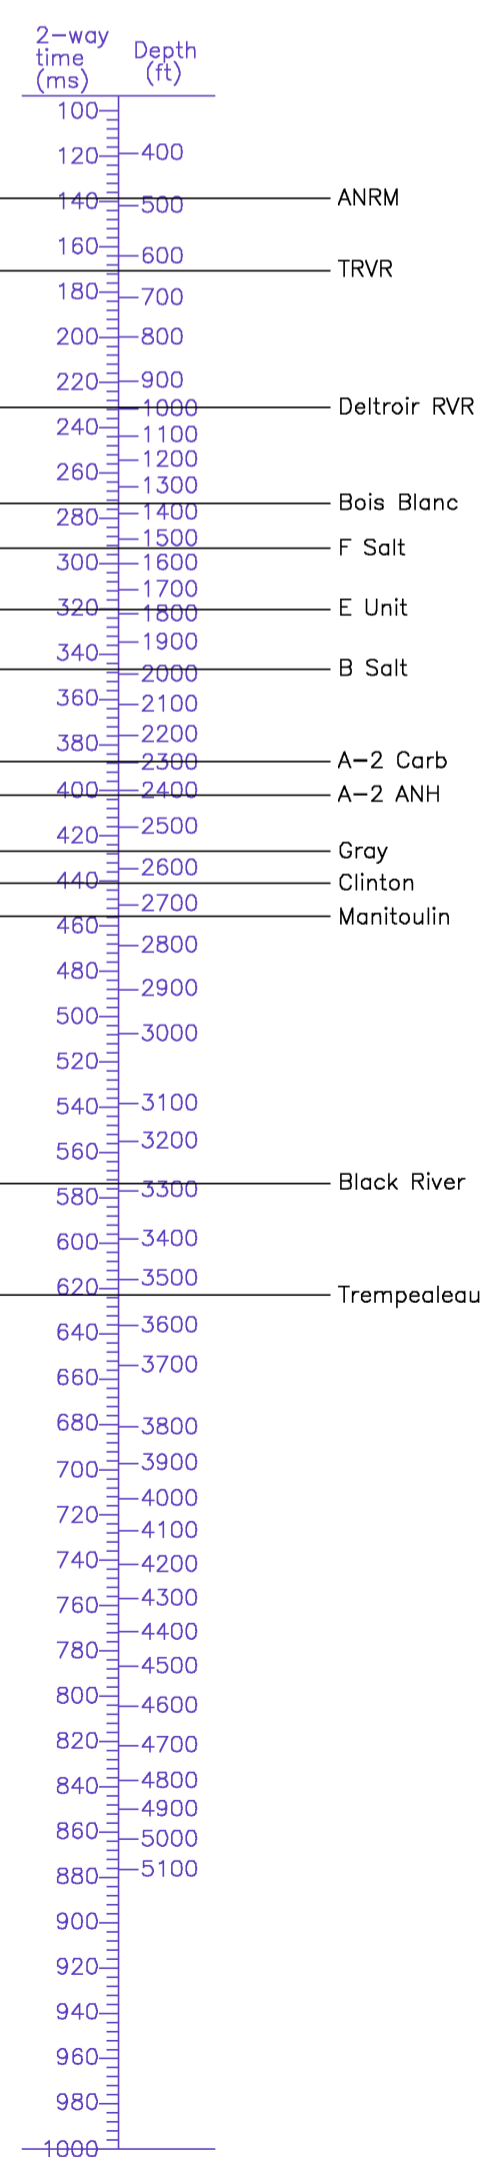

Supplement: s1 [file s1]
