# Supplementary material
Source: MDPI journal article supplement (https://www.mdpi.com/2076-3263/11/3/142)

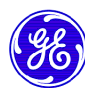

CONSUMERS ENERGY

WELL: P-201  
FIELD: WILDCAT  
LOCATION: SAINT CLAIRE COUNTY, MI, USA  
ZERO OFFSET VSP

ENCLOSURE 3B: NEW CORRELATION

ACQUISITION BY BAKER HUGHES GE JUNE 2019  
PROCESSED BY BAKER HUGHES GE JUNE 2019

ACQUISITION INFORMATION

KB ELEVATION 656 FT AMSL  
MINIMUM DEPTH 125 FT (MD KB)  
MAXIMUM DEPTH 2375 FT (MD KB)  
CASING 7 IN 0 - 2490  
ENERGY SOURCE VIBRATOR  
SOURCE ELEVATION 643 FT AMSL  
SOURCE EASTING FROM WELLHEAD -175 FT  
SOURCE NORTHING FROM WELLHEAD -40 FT  
RECORD LENGTH 6 SECONDS  
SAMPLE INTERVAL 1 MS

PROCESSING

Edit, stack and pick first arrival times  
Correction for geometric spreading using  $t^{*2.2}$   
Estimation of downgoing P-waves: first breaks aligned at 200ms  
7-point median filter  
Zero phase bandpass filter: 10(18)- 135(36) Hz(dB/Oct)  
Subtraction of downgoing P-waves using 9-point median  
Zero phase bandpass filter: 10(18)- 135(36) Hz(dB/Oct)  
Enhancement: 3-point median filter  
Zero phase bandpass filter: 10(18)- 135(36) Hz(dB/Oct)  
VSP deconvolution of upgoing waves:  
1007 msec operator derived from downgoing P-waves, 5% WN  
Zero phase bandpass filter: 10(18)- 135(36) Hz(dB/Oct)  
Enhancement: 5-point median filter  
Zero phase bandpass filter: 10(18)- 135(36) Hz(dB/Oct)  
Datum correction  
Shift to two-way time  
Corridor window of enhanced deconvolved upgoing waves  
Stack of corridor window  
8 traces repeat.  
Zero phase, Normal polarity, bandpass filter:  
10(18)-470(36) Hz(dB/oct)

Vertical scale: 20 cm/sec  
Seismic Datum: Ground Level = 643 ft AMSL  
Replacement velocity: 6,000 ft/sec  
Note: Surface Seismic Datum=1,000 ft AMSL & Vrep=10,000 ft/s.  
Required two way time shift to bring Surface Seismic  
to VSP = -71 ms. So actual time shift is 71ms-15ms=56ms

NORMAL POLARITY

AN INCREASE IN ACOUSTIC IMPEDANCE  
IS DISPLAYED AS A PEAK

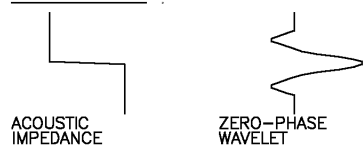

Corridor Stack  
10-135 Hz

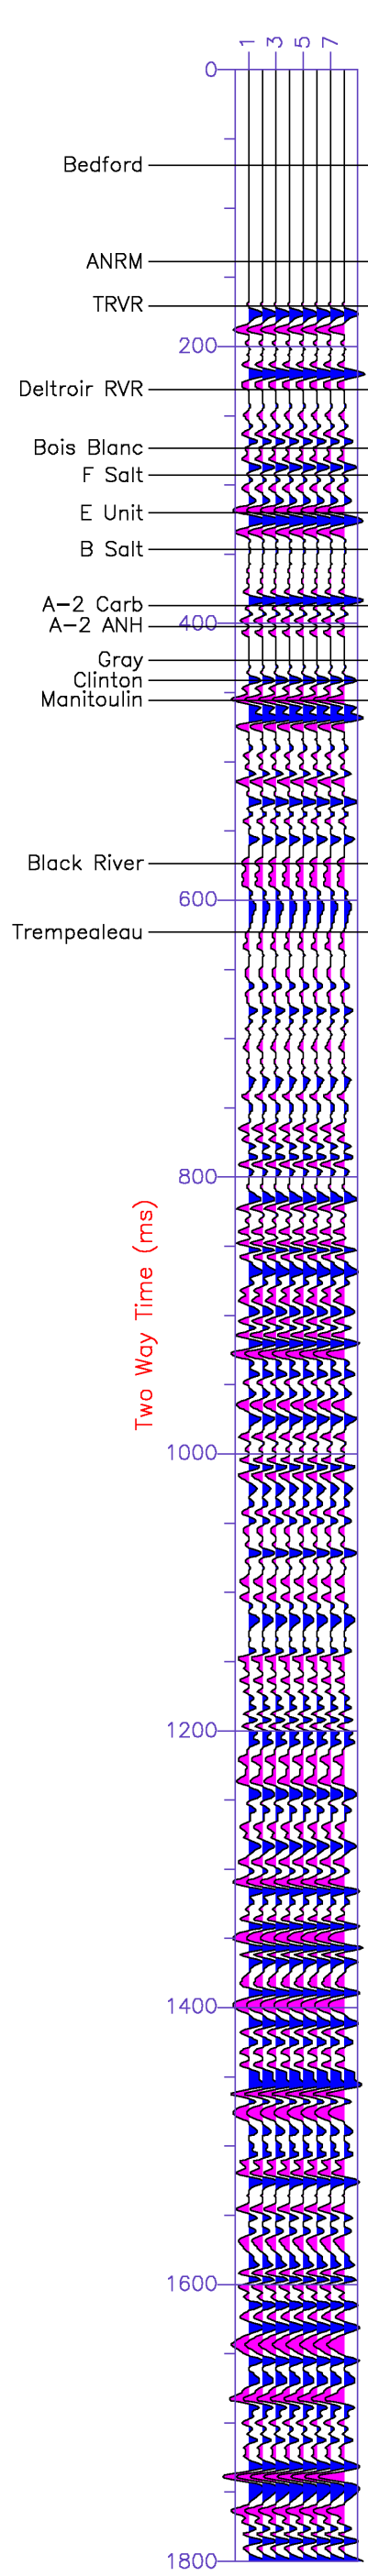

Inline 91 VS Corridor Stack 8-110 Hz  
Surface Seismic has a -15 ms time shift

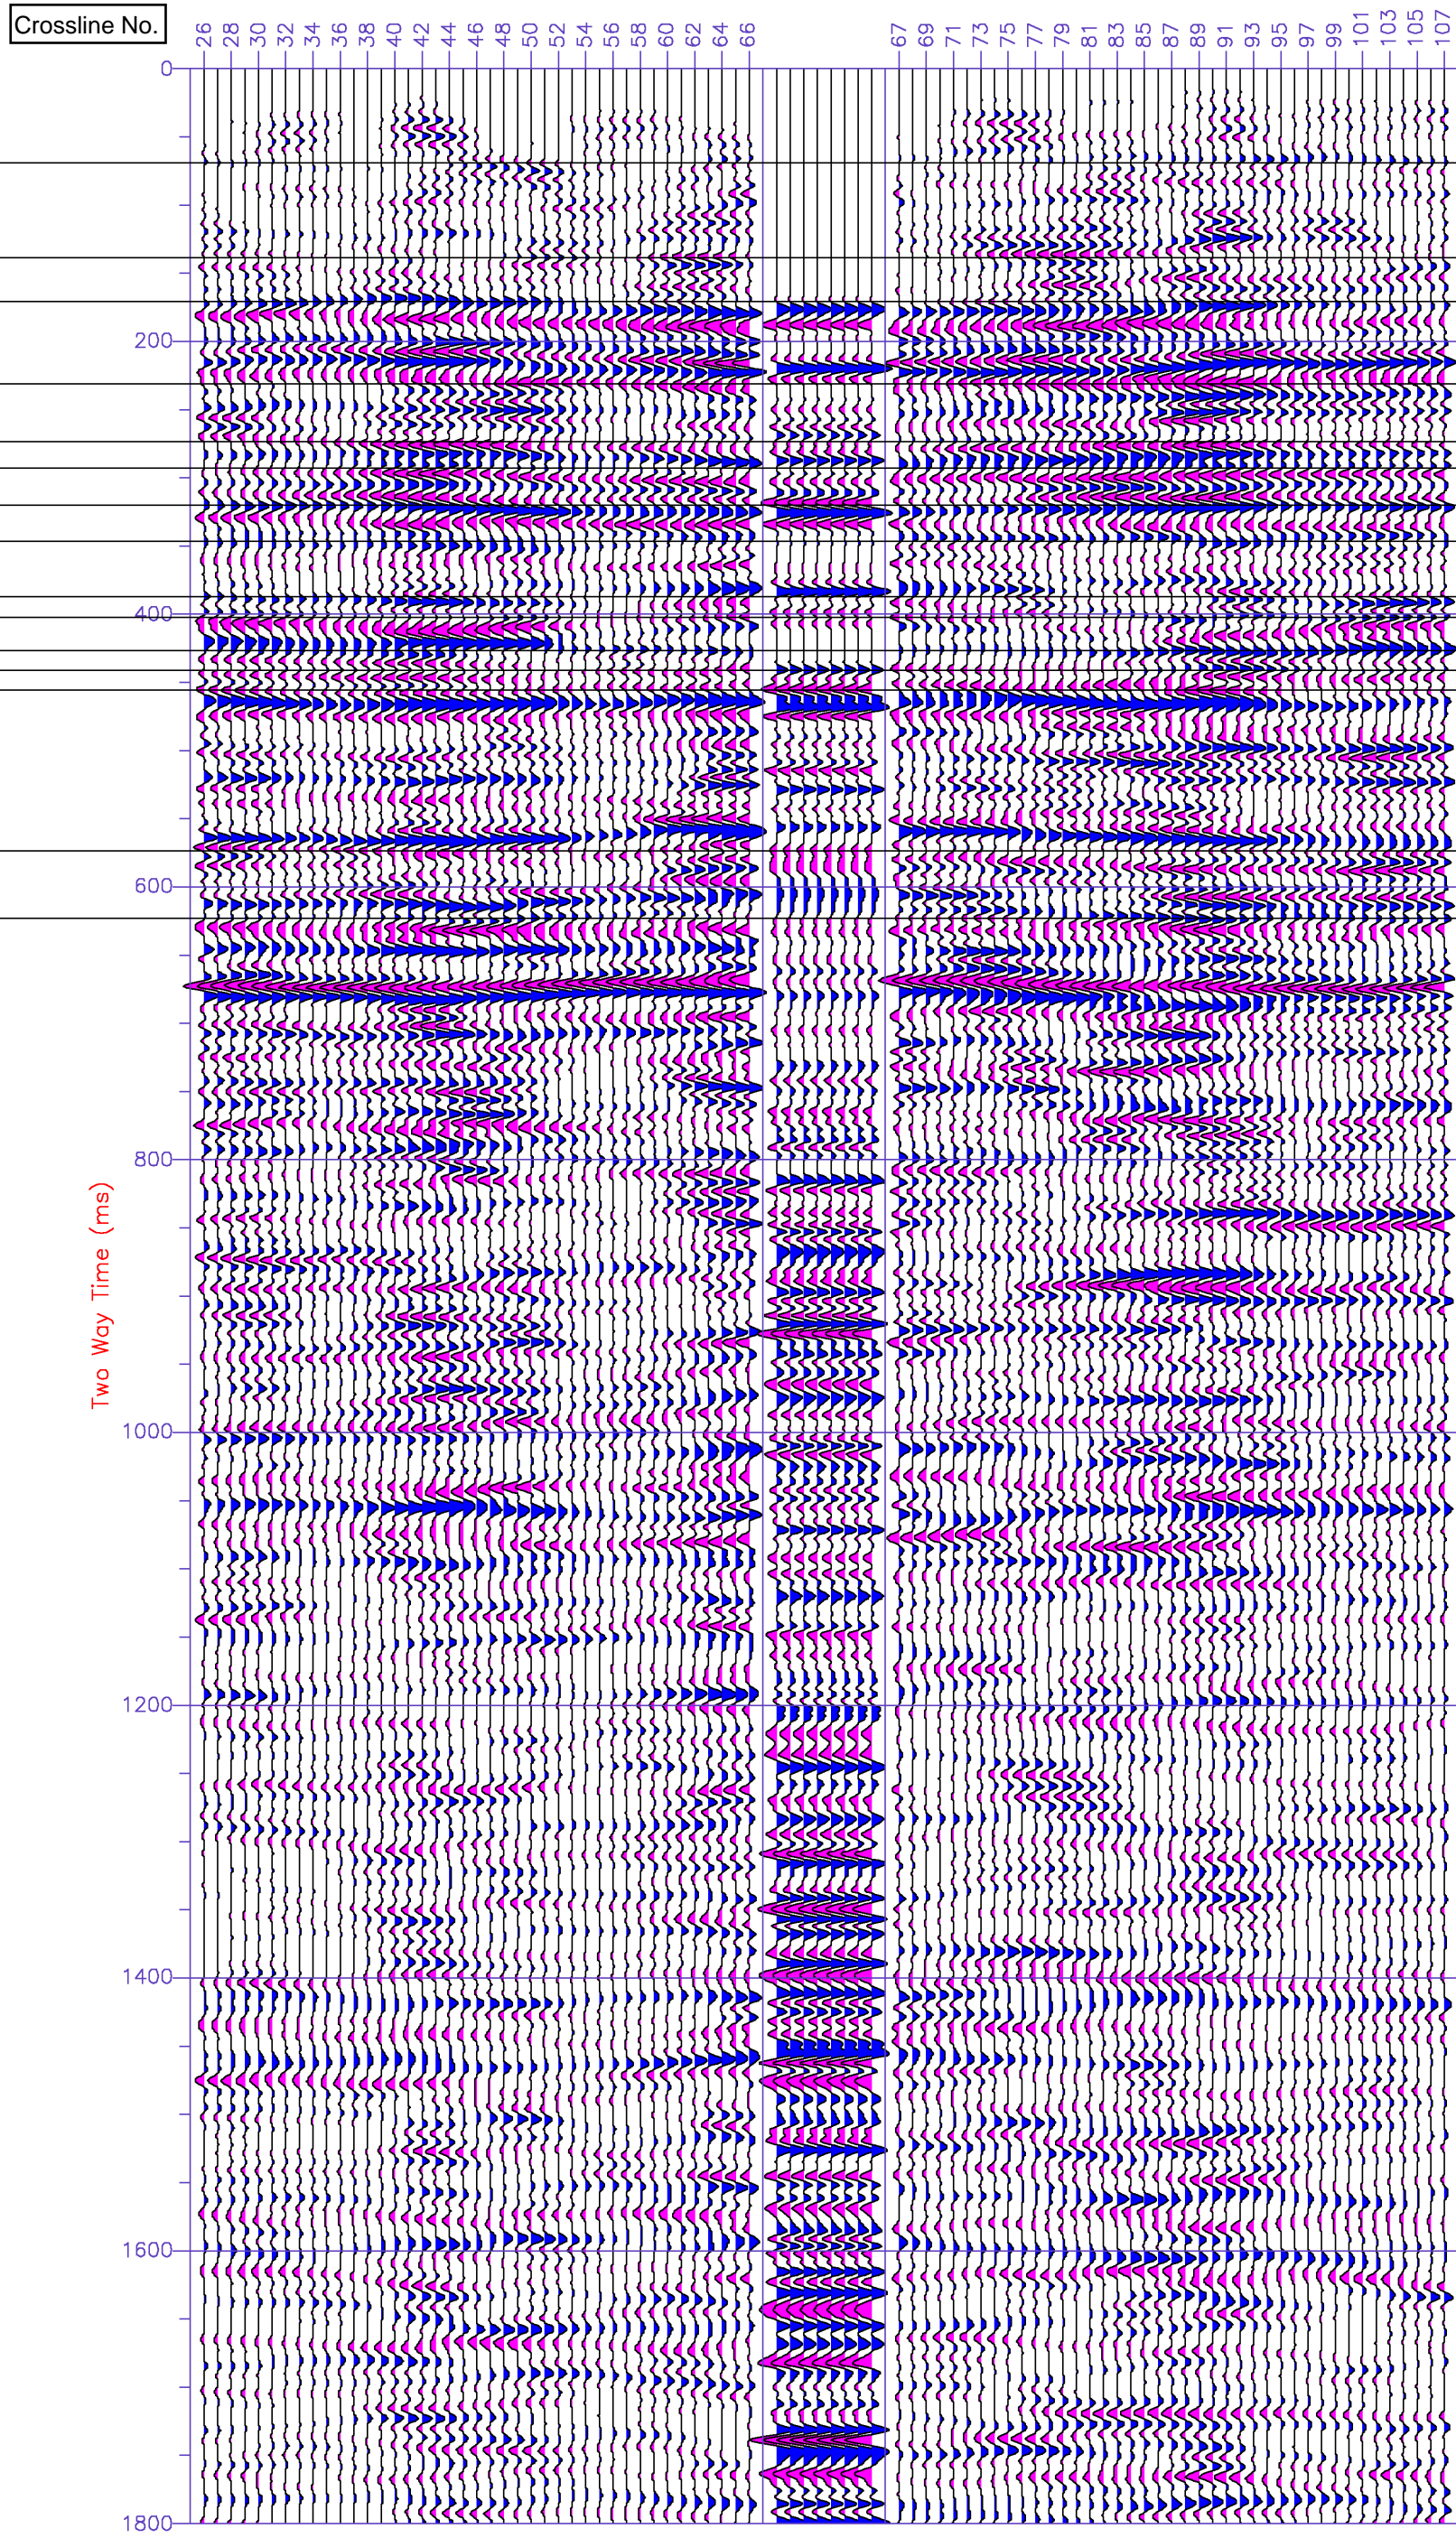

Crossline 66 VS Corridor Stack 8-110 Hz  
Surface Seismic has a -15 ms time shift

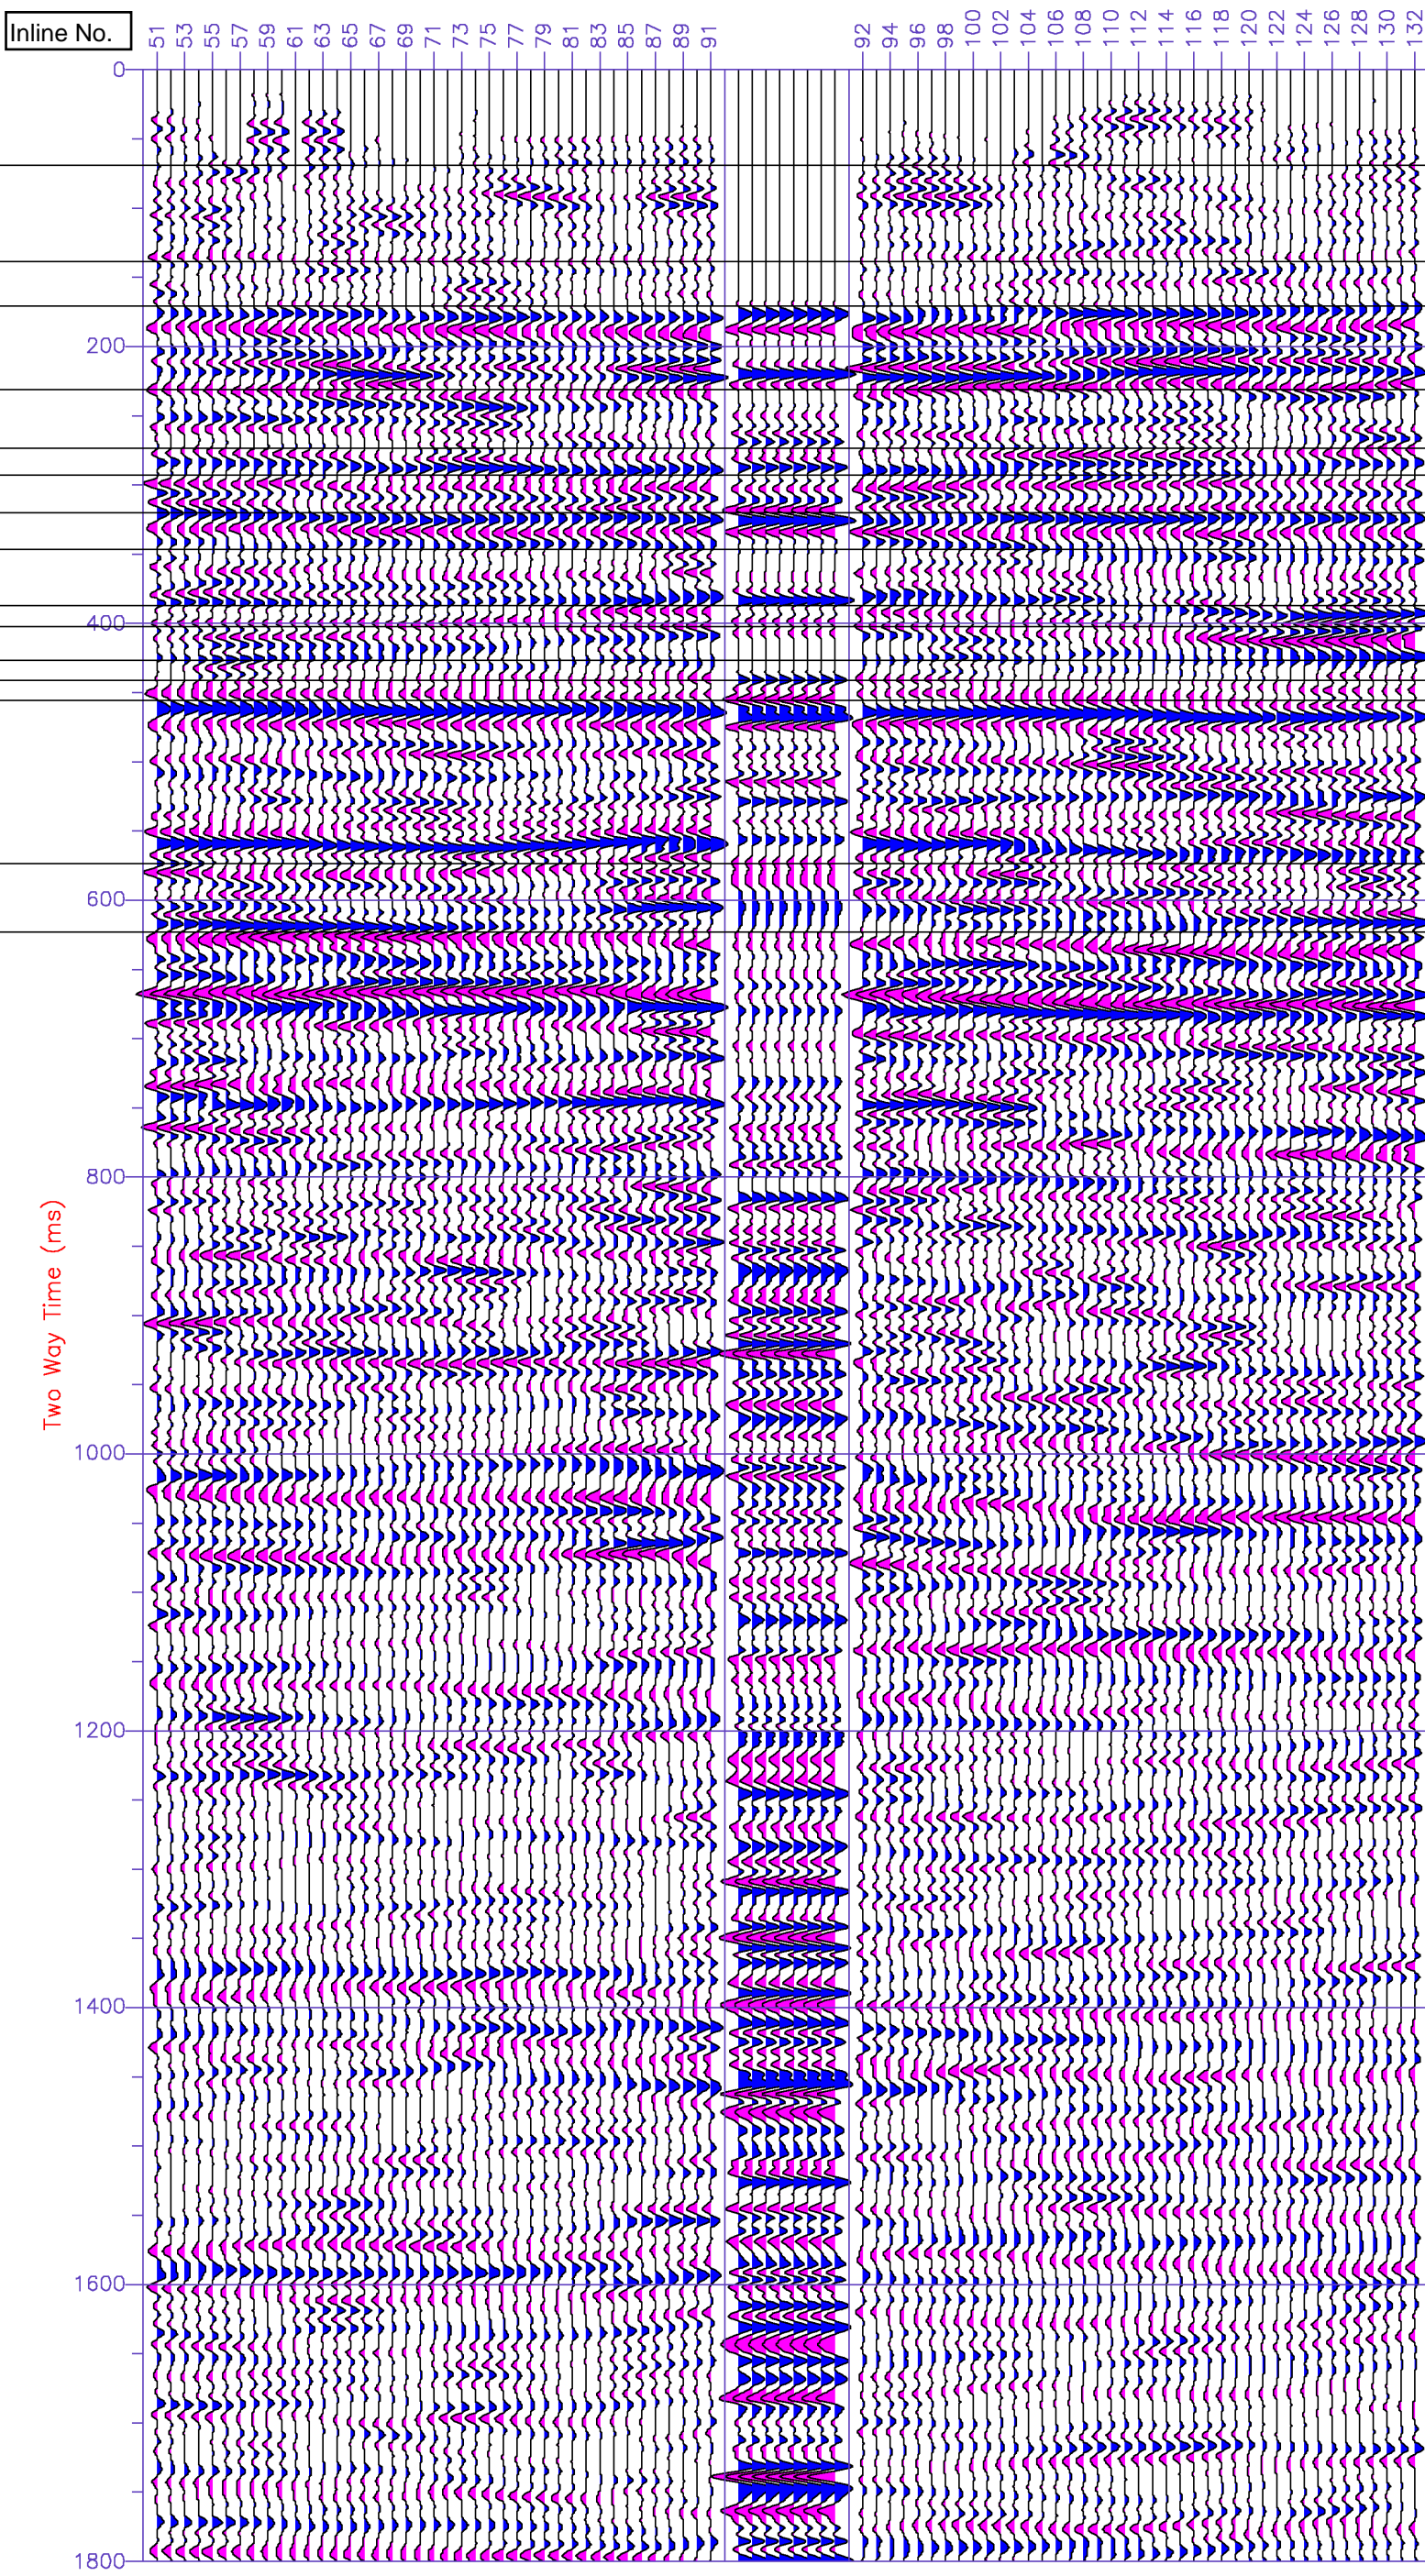

Supplement: s1 [file s1]
