# Supplementary material
Source: MDPI journal article supplement (https://www.mdpi.com/2076-3263/11/3/142)

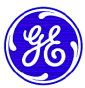

## CONSUMERS ENERGY

WELL: P-201

FIELD: WILDCAT

LOCATION: SAINT CLAIRE COUNTY, MI, USA

OFFSET VSP

### ENCLOSURE 4: OVSP CORRELATION

ACQUISITION BY BAKER HUGHES GE JUNE 2019  
PROCESSED BY BAKER HUGHES GE JUNE 2019

#### ACQUISITION INFORMATION

KB ELEVATION 656 FT AMSL  
MINIMUM DEPTH 525 FT (MD KB)  
MAXIMUM DEPTH 2375 FT (MD KB)  
CASING 7 IN O - 2490  
ENERGY SOURCE VIBRATOR  
SOURCE ELEVATION 643 FT AMSL  
SOURCE EASTING FROM WELLHEAD -149.6 FT  
SOURCE NORTHING FROM WELLHEAD -956.6 FT  
RECORD LENGTH 6 SECONDS  
SAMPLE INTERVAL 1 MS

#### PROCESSING

Edit, stack and pick first arrival times  
Horizontal and Vertical Rotation.  
Repick first arrivals on Direct component.  
Correction for geometric spreading using  $t^{**2.0}$   
Subtract downgoing P and S wavefields.  
Model based rotation to extract upgoing P and S wavefields.  
Zero phase bandpass filter: 8(18) - 135(36) Hz(dB/Oct).  
Deterministic deconvolution of upgoing P and S wavefields:  
158 msec operator derived from downgoing P-waves, 5% WN  
Zero phase bandpass filter: 8(18) - 135(36) Hz(dB/Oct).  
Enhancement: 3-point median filter.  
Zero phase bandpass filter: 8(18) - 135(36) Hz(dB/Oct).  
Imaging by CDP Transform + Front mute.  
Conversion depth-time using vel. model modified from ZVSP.  
Zero phase, Normal polarity, bandpass filter:  
8(18)-110(36) Hz(dB/oct)

Vertical scale: 40 cm/sec  
Seismic Datum: Ground Level = 643 ft AMSL  
Replacement velocity: 6,000 ft/sec  
Note: Surface Seismic Datum=1,000 ft AMSL & Vrep=10,000 ft/s.

NORMAL POLARITY

AN INCREASE IN ACOUSTIC IMPEDANCE  
IS DISPLAYED AS A PEAK

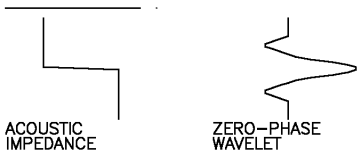

OVSP Ovelaid to Crossline 66  
Time shifts: Xline= -15 ms ; OVSP= +10 ms. OVSP 8-110 Hz

OVSP CDP Transform  
+10 ms time shift and 8-135 Hz

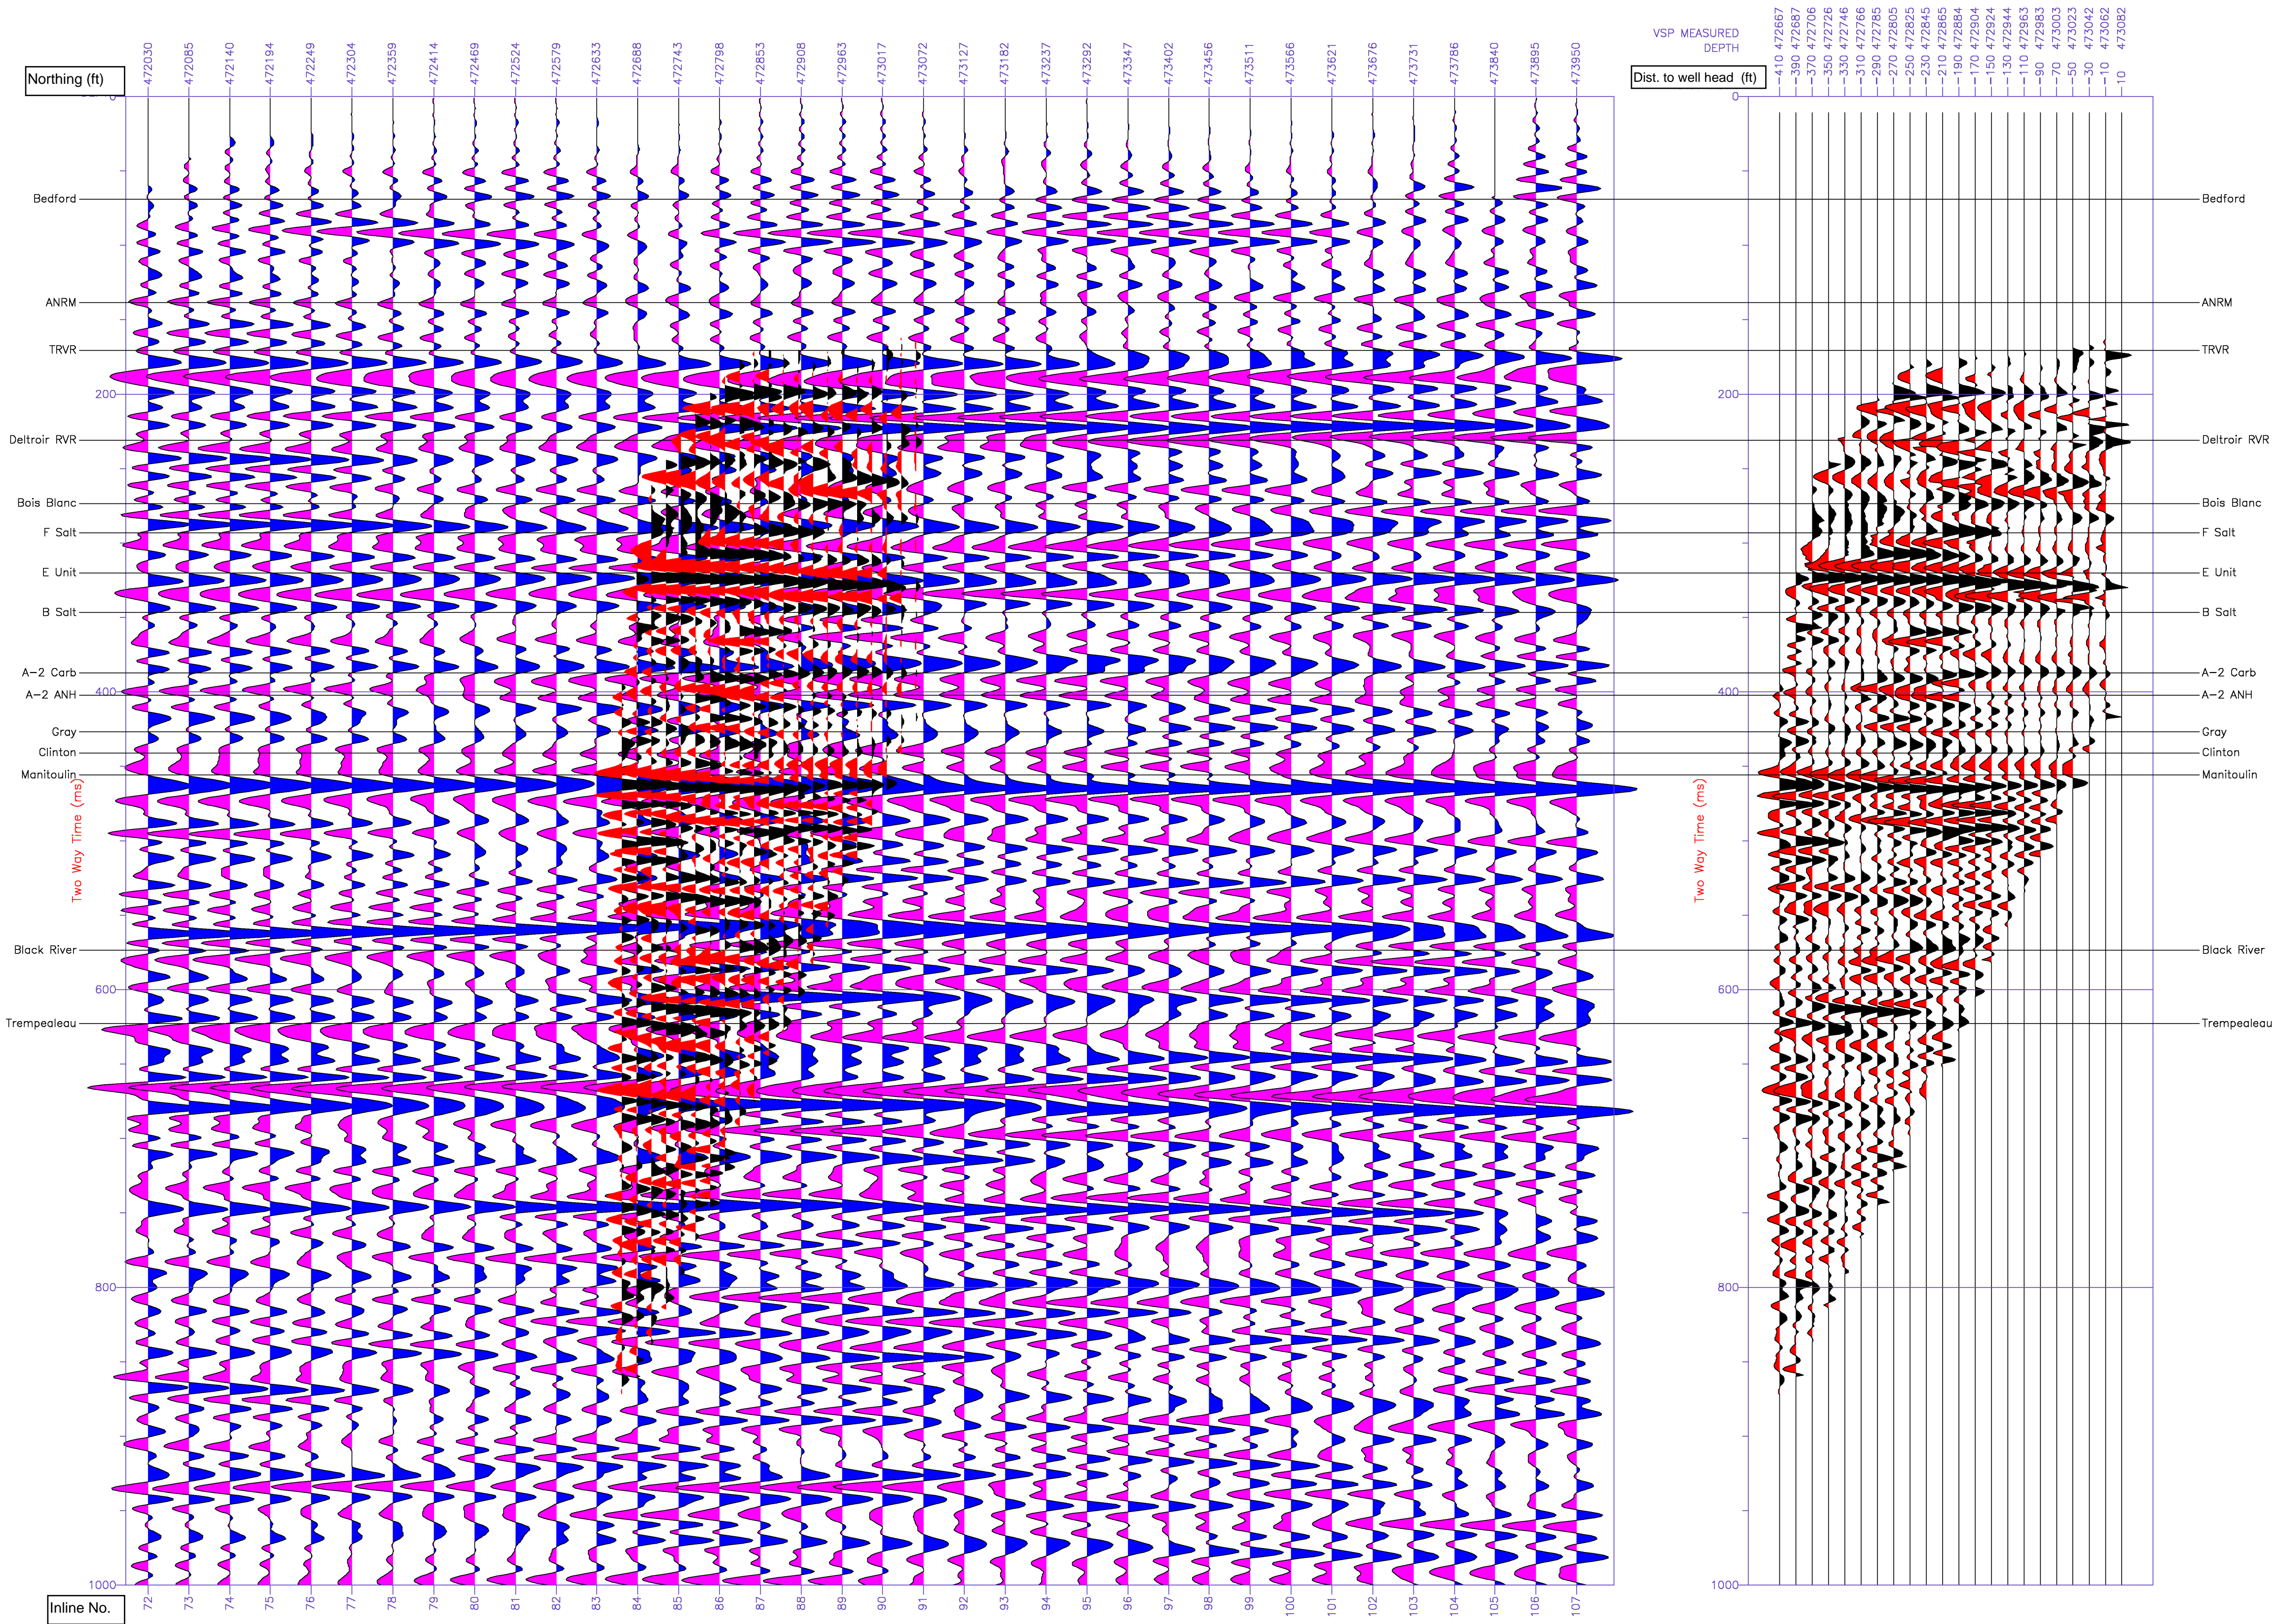

Supplement: s1 [file s1]
